# Supplementary material for: In situfabrication of MIL-68(In)@ZnIn2S4heterojunction for enhanced photocatalytic hydrogen production
Source: Royal Society of Chemistry journal article supplement (doi:10.1039/d2nr07017k), 2023-01-01
Supplement: d2nr07017k1.pdf [file d2nr07017k1.pdf]

## Supplementary material

### **In-situ fabrication of MIL-68(In)@ZnIn<sub>2</sub>S<sub>4</sub> heterojunction for enhanced photocatalytic hydrogen production**

Mengxi Tan<sup>a,b</sup>, Chengye Yu<sup>a,b</sup>, Hua Zeng<sup>a,b</sup>, Chuanbao Liu<sup>a,c</sup>, Wenjun Dong<sup>a,c</sup>, Huimin Meng<sup>b</sup>,

Yanjin Su<sup>a,b</sup>, Lijie Qiao<sup>a,b</sup>, Lei Gao<sup>a,b</sup>, Qipeng Lu<sup>c</sup>, Yang Bai<sup>\*a,b</sup>

<sup>a</sup> Beijing Advanced Innovation Center for Materials Genome Engineering, University of  
Science and Technology Beijing, Beijing 100083, China

<sup>b</sup> Institute for Advanced Material and Technology, University of Science and Technology  
Beijing, Beijing 100083, China

<sup>c</sup> School of Materials Science and Engineering, University of Science and Technology Beijing,  
Beijing 100083, China

\*Author to whom correspondence should be addressed.

Prof. Y. Bai, Email: baiy@mater.ustb.edu.cn



## 1. Characterization

The crystal structure of photocatalysts was analyzed by X-ray diffraction (XRD, Rigaku Ultima IV, Japan) using Cu K $\alpha$  radiation (40 kV, 40 mA). The microscopic morphology was observed by field-emission scanning electron microscope (FE-SEM, SUPRA 55, Zeiss) and transmission electron microscope (TEM, JEM-2200FS, JEOL). Energy-dispersive X-ray spectroscopy (EDS) mapping was also obtained by TEM. The X-ray photoelectron spectra (XPS) were determined by an AXIS ULTRA DLD spectrometer using a monochromatic Al K $\alpha$  radiation ( $h\nu = 1486.6$  eV). The texture properties of samples were characterized by Brunauer-Emmett-Teller (BET, ASAP 2460). The Ultraviolet-visible diffuse reflectance spectra (UV-vis DRS) were measured with Shimadzu UV-2550. The steady-state photoluminescence (PL) spectra and time-resolved photoluminescence (TRPL) decay plots were implemented on the spectrophotometer (FLS980) with an excitation wavelength of 314 nm. A typical three-electrode cell using the CHI660E electrochemical workstation was employed to determine the photoelectrochemical performance. The photocatalysts (5 mg) were dispersed in an ethanol solution containing 10 vol% Nafion reagents. The mixed solution was uniformly deposited on a 1 cm  $\times$  1 cm FTO conductive glass as a working electrode, while the Pt sheets and Ag/AgCl electrodes were used as counter and reference electrodes, respectively, and 0.5 M Na<sub>2</sub>SO<sub>4</sub> aqueous solution was used as the electrolyte. The electron paramagnetic resonance (EPR) characterization: Endor spectrometer (JES-FA300, JEOL) was used for the characterization of EPR with 300 W Xenon lamp and a 420 nm cutoff filter at room temperature. For the test of  $\cdot\text{O}_2^-$ , 5 mg sample was dispersed into methanol (1 mL). Then, 5,5-dimethyl-1-pyrroline N-oxide (DMPO) was added to the mixture. Under light irradiation, the signals at 0 and 10 min were

collected. For the test of  $h^+$ , 5 mg sample was dispersed into acetonitrile (1 mL), and then 2,2,6,6-tetramethylpiperidinoxy (TEMPO) was added into the mixture. Under light irradiation, the signals at 0 min and 10 min were collected.

## 2. Tables and Figures

Table S1. The AQEs of MIL-68(In)-20@ZIS at different wavelengths.

| Wavelength (nm) | 400   | 420  | 450  | 500   | 550   |
|-----------------|-------|------|------|-------|-------|
| AQE (%)         | 0.702 | 0.44 | 0.22 | 0.019 | 0.002 |

Table S2. Exponential decay-fitted parameters of fluorescence lifetimes for ZIS and MIL-68(In)-20@ZIS.

| Sample            | $\tau_1$ (ns) | $A_1$ (%) | $\tau_2$ (ns) | $A_2$ (%) | $\tau_A$ (ns) |
|-------------------|---------------|-----------|---------------|-----------|---------------|
| ZIS               | 0.63          | 30.10     | 2.20          | 69.90     | 2.03          |
| MIL-68(In)-20@ZIS | 1.48          | 63.94     | 4.97          | 36.06     | 3.76          |

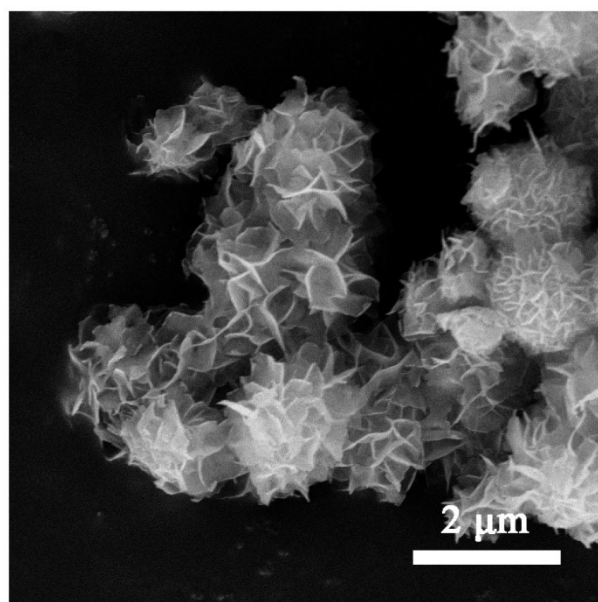

Fig. S1. The SEM image of pure ZIS.

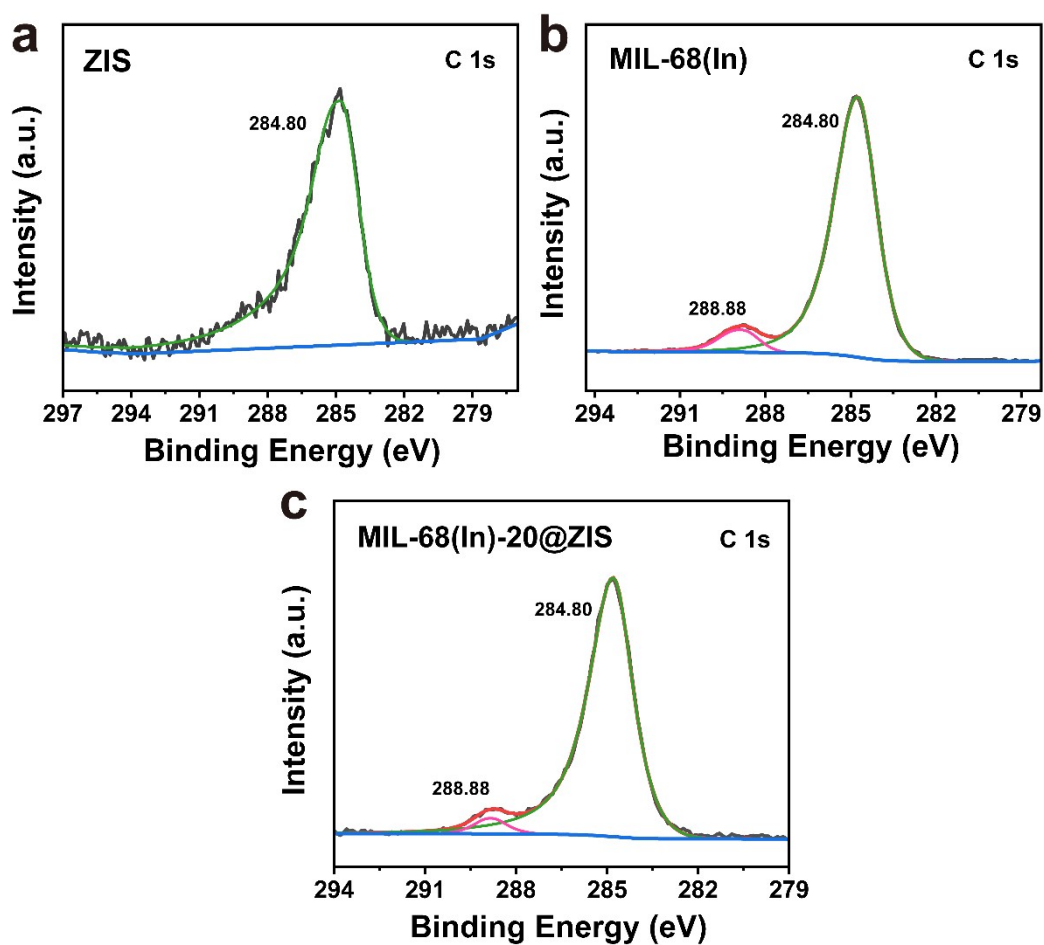

Fig. S2. The high-resolution XPS spectra of C 1s for ZIS, MIL-68(In) and MIL-68(In)-20@ZIS.

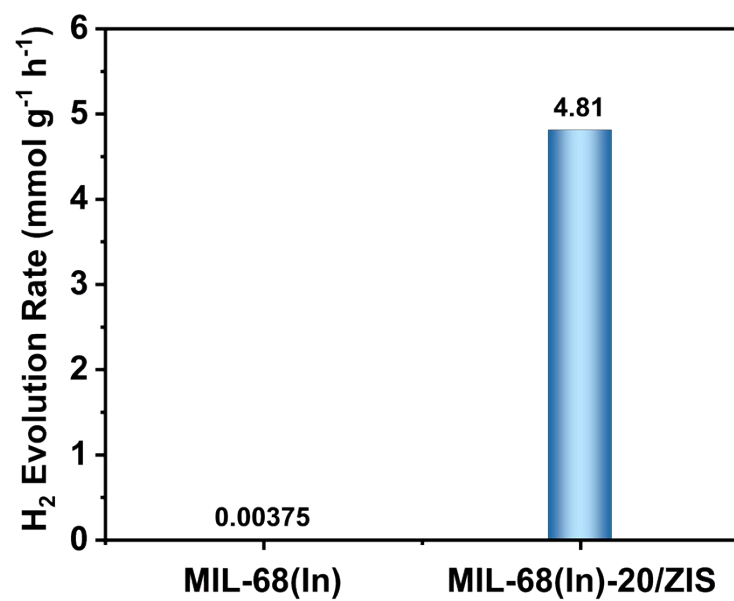

Fig. S3. The photocatalytic hydrogen evolution rates of MIL-68(In) and MIL-68(In)-20/ZIS.

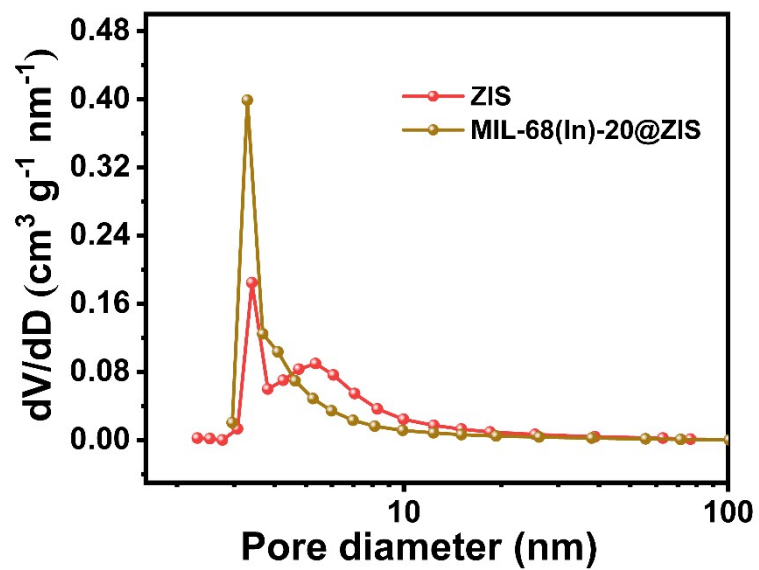

Fig. S4. The pore size distribution of ZIS and MIL-68(In)-20@ZIS.

Table S3. Textural properties of samples.

| Samples           | $S_{\text{BET}}$               | Pore volume                     | Average pore size |
|-------------------|--------------------------------|---------------------------------|-------------------|
|                   | ( $\text{m}^2 \text{g}^{-1}$ ) | ( $\text{cm}^3 \text{g}^{-1}$ ) | (nm)              |
| ZIS               | 209.82                         | 0.7588                          | 12.54             |
| MIL-68(In)-20@ZIS | 210.58                         | 0.6129                          | 10.18             |
